# Supplementary material
Source: Springer Nature journal article supplement (https://www.springermedizin.de/resource/supplementary/13011_2009_114_MOESM1_ESM.pdf/9628422)
Supplement: MOESM1 [file 9628422]

**Table s1. Prevalence and intensity of injection and non-injection drug use among a cohort of Thai injection drug users  
(n = 252)**

| <b>Type of Drug</b>       | <b>Injection (times per day)*</b> |                     |                            |                     | <b>Non-injection (times per day)*</b> |                     |                            |                     |
|---------------------------|-----------------------------------|---------------------|----------------------------|---------------------|---------------------------------------|---------------------|----------------------------|---------------------|
|                           | <b><u>Less than daily</u></b>     | <b><u>1 - 2</u></b> | <b><u>&gt; 2 daily</u></b> | <b><u>Total</u></b> | <b><u>Less than Daily</u></b>         | <b><u>1 - 2</u></b> | <b><u>&gt; 2 Daily</u></b> | <b><u>Total</u></b> |
| <b>Heroin</b>             | 74 (29.4%)                        | 113 (44.8%)         | 42 (16.7%)                 | <b>229 (90.9%)</b>  | 1 (0.4%)                              | 9 (3.6%)            | 9 (3.6%)                   | <b>19 (7.5%)</b>    |
| <b>Yaba/Ice</b>           | 59 (23.4%)                        | 66 (26.2%)          | 20 (7.9%)                  | <b>143 (56.7%)</b>  | 35 (13.9%)                            | 32 (12.7%)          | 26 (10.3%)                 | <b>93 (36.9%)</b>   |
| <b>Ecstasy</b>            | --                                | --                  | --                         | --                  | 5 (2.0%)                              | 4 (1.6%)            | --                         | <b>9 (3.6%)</b>     |
| <b>Midazolam</b>          | 34 (13.5%)                        | 98 (38.9%)          | 34 (13.5%)                 | <b>166 (65.9%)</b>  | 1 (0.4%)                              | 7 (2.8%)            | 2 (0.8%)                   | <b>10 (4.0%)</b>    |
| <b>Methadone</b>          | 3 (1.2%)                          | 9 (3.6%)            | 2 (0.8%)                   | <b>14 (5.6%)</b>    | 3 (1.2%)                              | 73 (29.0%)          | --                         | <b>76 (30.2%)</b>   |
| <b>Opiate<sup>†</sup></b> | 7 (2.8%)                          | 4 (1.6%)            | --                         | <b>11 (4.4%)</b>    | 2 (0.8%)                              | 3 (1.2%)            | --                         | <b>5 (2.0%)</b>     |
| <b>Morphine</b>           | 3 (1.2%)                          | 1 (0.4%)            | --                         | <b>4 (1.6%)</b>     | --                                    | --                  | --                         | --                  |
| <b>Benzodiazepine</b>     | --                                | --                  | --                         | --                  | 6 (2.4%)                              | 14 (5.6%)           | 10 (4.0%)                  | <b>30 (11.9%)</b>   |
| <b>Ketamine</b>           | --                                | --                  | --                         | --                  | 4 (1.6%)                              | 1 (0.4%)            | --                         | <b>5 (2.0%)</b>     |

*Note: Ecstasy, Benzodiazepine and Ketamine are only consumed through non-injection.*

*\*Percentages denote proportion of the total study sample*

*<sup>†</sup>Opiate refers to opiates other than heroin or methadone*
